# Supplementary material
Source: publisher figshare collection journal article supplement (https://frontiersin.figshare.com/ndownloader/files/13393241)

### ***Supplementary analysis of an alternative model***

Alternatively, we may assume that the food patch F supplies food at a constant food supply rate ( $s$ ). Supplementary Fig.1S schematically illustrates the alternative models. Fig.2S shows the parameters ( $A/D$  ratio of  $SS$  and  $LL$ ) where  $SS$  is more profitable than  $LL$  for each of the cases shown in Fig.1S.

Profitability is given as follows:

$$\text{If } \Phi \text{ follows } \Omega, \quad \text{prof}_P = \frac{A}{D+A/s} \dots\dots\dots (1S)$$

$$\text{If } \Phi \text{ precedes } \Omega, \quad \text{prof}_P = \frac{A+sT}{2(D+A/s)} \dots\dots\dots (2S)$$

We will show conditions where

$$\text{prof}_p(SS) > \text{prof}_p(LL) \dots\dots\dots (3S)$$

holds true for each of the following cases.

**Case (1);** no scrounging for both  $SS$  and  $LL$

$$A_{SS} < A_{LL} \leq sT$$

**Case (2);** scrounging for  $LL$  but not for  $SS$

$$A_{SS} \leq sT < A_{LL}$$

**Case (3);** scrounging for both  $LL$  and  $SS$

$$sT < A_{SS} < A_{LL}$$

#### **Case (1)**

The inequality (3S) is given in the same way as the original mode, such as

$$\frac{A_{SS}}{D_{SS}+A_{SS}/s} > \frac{A_{LL}}{D_{LL}+A_{LL}/s} \dots\dots\dots (4S)$$

which is equivalent with a much simpler form for  $\forall s > 0$

$$\frac{A_{SS}}{D_{SS}} > \frac{A_{LL}}{D_{LL}} \dots\dots\dots (4'S)$$

meaning that  $SS$  is more profitable than  $LL$ , when and only when the  $A/D$  ratio is larger for  $SS$  than for  $LL$  (Figure 2S left).

### Case (2)

The inequality formula (3S) is given as

$$\frac{A_{SS}}{D_{SS}+A_{SS}/s} > \frac{A_{LL}+sT}{2(D_{LL}+A_{LL}/s)} \dots\dots\dots (5S)$$

which is equivalent with

$$f = \frac{s(2D_{LL}A_{SS}-D_{SS}A_{LL})+A_{LL}A_{SS}}{s(sD_{SS}+A_{SS})} > T \dots\dots\dots (5'S)$$

meaning that  $T$  has an upper limit given by  $f$ . As the denominator is positive, an upper limit exists for  $\forall s > 0$  if coefficient of  $s$  in the numerator is larger than 0, namely when

$$\frac{2A_{SS}}{D_{SS}} > \frac{A_{LL}}{D_{LL}} \dots\dots\dots (6S)$$

holds. If otherwise, the upper limit of  $T$  exists when food supply rate  $s$  is above a certain level given by;

$$s > \frac{A_{LL}A_{SS}}{A_{LL}D_{SS}-2A_{SS}D_{LL}} > 0 \dots\dots\dots (7S)$$

This means that  $SS$  is more profitable than  $LL$ , if  $T$  is short enough, and the upper limit appears whenever the  $A/D$  ratio of  $SS$  is higher than the half of  $LL$  (as (6S) indicates). Even when the  $A/D$  ratio of  $SS$  is even lower, a positive  $T$  value exists so that  $SS$  is more profitable than  $LL$ , if  $s$  is high above the lower limit given by (7S). Similarly to the case (1),  $A/D$  ratios that satisfy the inequality (6S) are illustrated in intermediate brown in Figure 2S center. The area where (7S) matters is illustrated in thin brown in this figure.

### Case (3)

The inequality formula (3S) is given as

$$\frac{A_{SS}+sT}{2(D_{SS}+A_{SS}/s)} > \frac{A_{LL}+sT}{2(D_{LL}+A_{LL}/s)} \dots\dots\dots (8S)$$

which is equivalent with

$$g = \frac{A_{LL}D_{SS}-A_{SS}D_{LL}}{(D_{LL}-D_{SS})s+(A_{LL}-A_{SS})} < T \dots\dots\dots (8'S)$$

Supplementary document to:

“Ecological validity of impulsive choice: consequences of profitability-based short-sighted evaluation in the producer-scrounger resource competition” by Ogura, Amita and Matsushima (2018) *Frontiers in Applied Mathematics and Statistics* (doi: 10.3389/fams.2018.00049)

meaning that  $T$  has a lower limit given by  $g$ , when it is positive. If otherwise, and  $g$  is 0 or negative, the inequality (9) holds for  $\forall T > 0$ , namely;

$$\frac{A_{SS}}{D_{SS}} \geq \frac{A_{LL}}{D_{LL}} \dots\dots\dots (9S)$$

holds. Therefore,  $SS$  is unconditionally (*i.e.*, for  $\forall T > 0$  and  $\forall s > 0$ ) more profitable than  $LL$ , in the area illustrated in dark brown in Figure 2S right. Even when (9S) does not hold,  $SS$  can still be more profitable than  $LL$  if  $T$  is long enough above  $g$  (8'S).

**FIGURE 1S** Assumptions of the alternative model, in which  $s$  represents the slope of food supply per time, rather than the speed of food consumption per time per individual. For other terminologies see Figure 2 of the main text.

**FIGURE 2S** Areas of parameters ( $A/D$  ratio) for  $SS$  (abscissa) and  $LL$  (ordinate) where  $SS$  gives rise to a higher profitability than  $LL$ , for Case (1), Case (2) and Case (3), respectively.

A

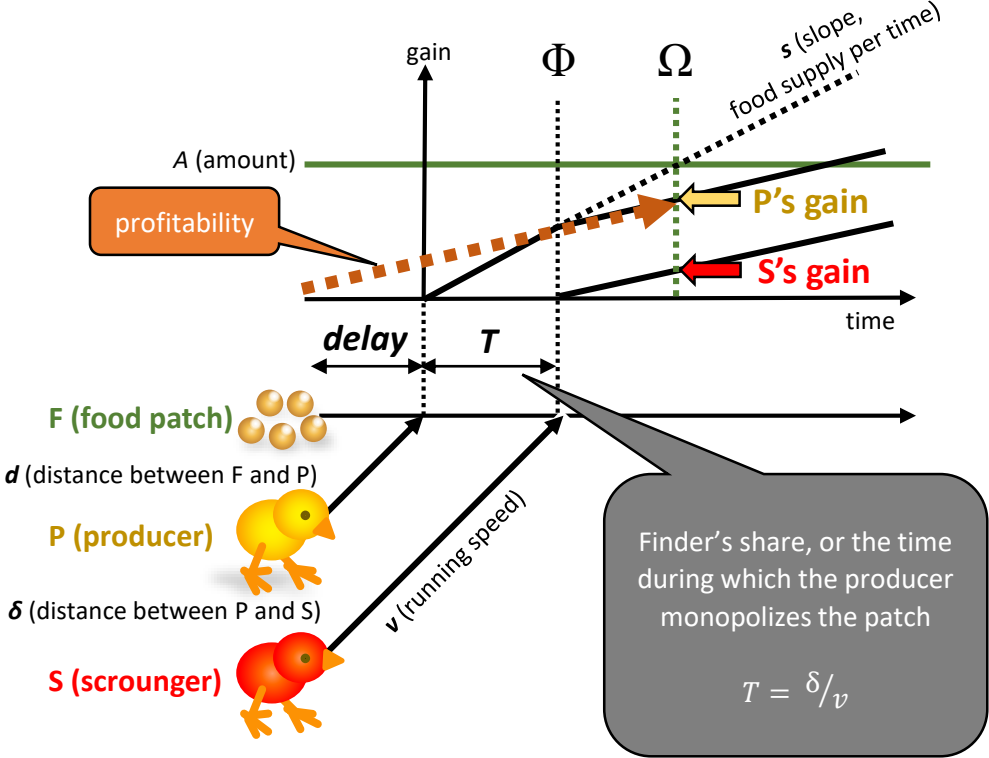

B

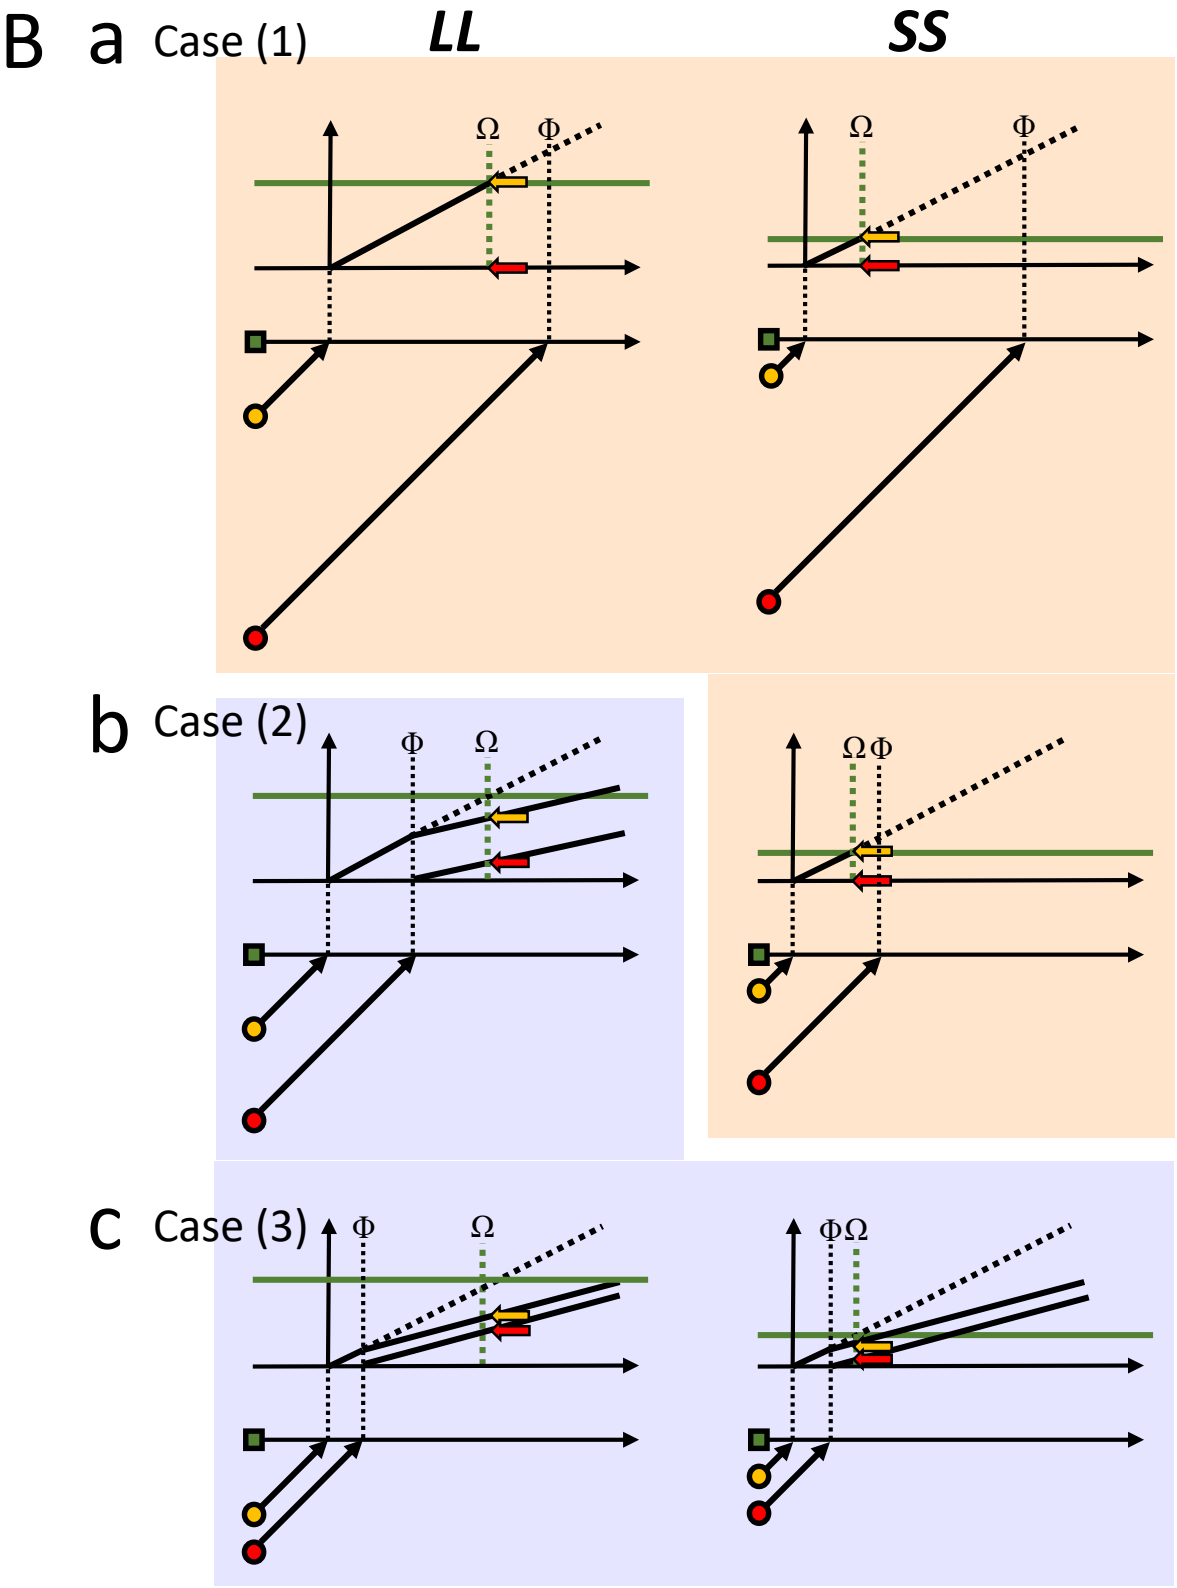

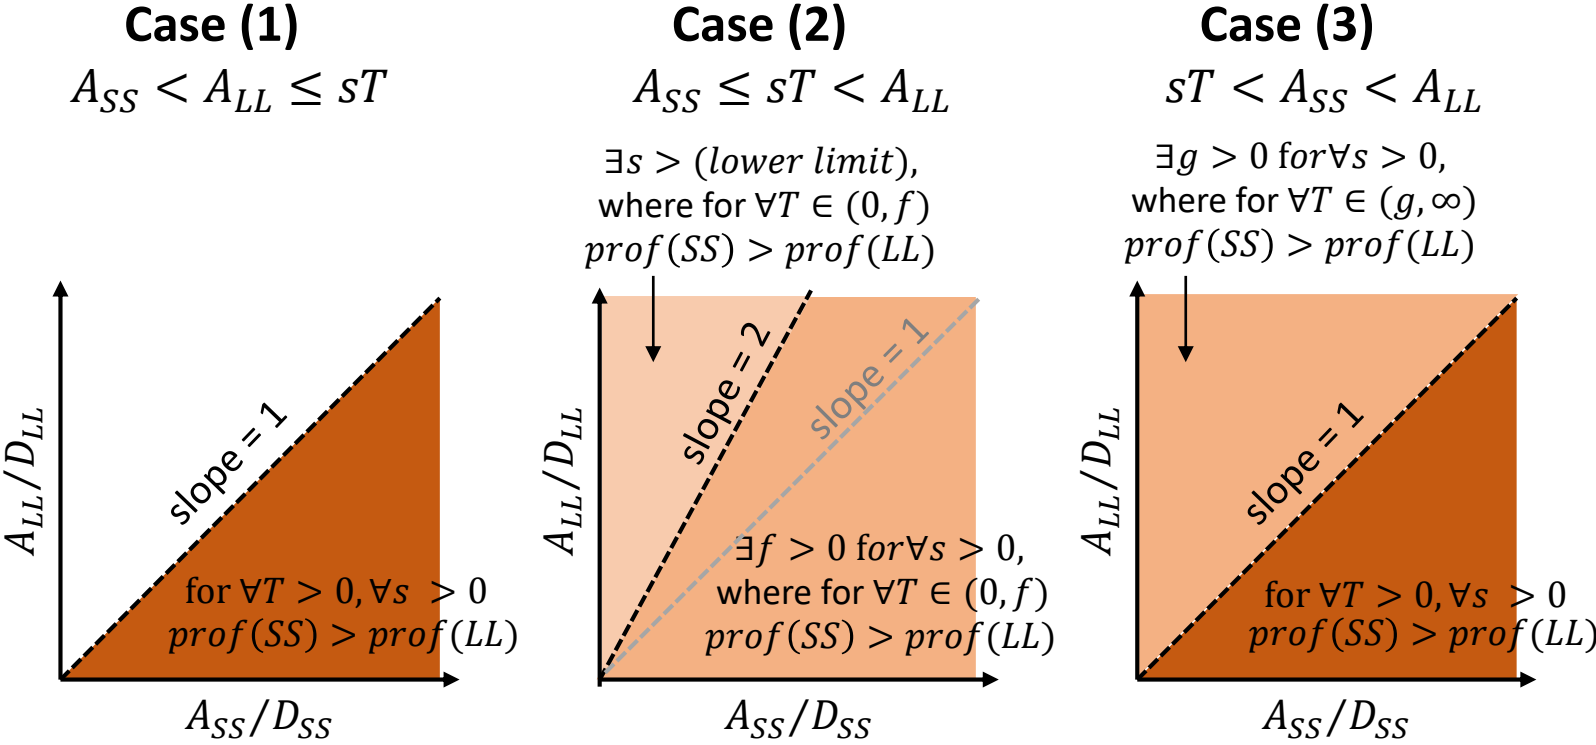

Supplement: Supplementary file 1 [file 13393241]
